# Supplementary material for: A single-nucleotide-polymorphism-based genotyping assay for simultaneous detection of different carbendazim-resistant genotypes in the Fusarium graminearum species complex
Source: PeerJ. 2016 Oct 25;4:e2609. doi: 10.7717/peerj.2609 (PMC5088611; doi:10.7717/peerj.2609)
Supplement: Table S1 [file peerj-04-2609-s001.xlsx]

## Sheet: Sheet1
Table S1 Previously developed probes (Ward et al. 2008) used in this study
Probe Name	MagPlex Bead	Tag	SNP-Sequence	Total Probe Sequence
M101-Tri12-15ADON(7)	7	TACACAAACAATCTTTCACAATTT	TACAGCGGTCGCAACTTC	TACACAAACAATCTTTCACAATTTTACAGCGGTCGCAACTTC
M102-Tri3-15ADON(8)	8	AAATAACTCACTATTTCACTTACA	ACTGACCCAAGCTGCCATC	AAATAACTCACTATTTCACTTACAACTGACCCAAGCTGCCATC
M103-Tri12-3ADON(9)	9	CACATCTAATACTTTATACAATTC	CTTTGGCAAGCCCGTGCA	CACATCTAATACTTTATACAATTCCTTTGGCAAGCCCGTGCA
M104-Tri3-3ADON(12)	12	CATAATCAATTTCAACTTTCTACT	CGCATTGGCTAACACATG	CATAATCAATTTCAACTTTCTACTCGCATTGGCTAACACATG
M105-Tri12-Niv(13)	13	CAAATACATAATCTTACATTCACT	TGGTCTCCTCGTTGTATCTGG	CAAATACATAATCTTACATTCACTTGGTCTCCTCGTTGTATCTGG
M106-Tri3-Niv(14)	14	AATTTCTTCTCTTTCTTTCACAAT	GACAAGTGCACAGAATATACG	AATTTCTTCTCTTTCTTTCACAATGACAAGTGCACAGAATATACG
M107-AT-B-clade(15)	15	TACTTCTTTACTACAATTTACAAC	ACGGTGCTATGGATATGG	TACTTCTTTACTACAATTTACAACACGGTGCTATGGATATGG
M108-EF-G-clade(18)	18	ACACTTATCTTTCAATTCAATTAC	TCATCATCACGTGTCAAC	ACACTTATCTTTCAATTCAATTACTCATCATCACGTGTCAAC
M109-AT-G-clade(19)	19	ATACTTTACAAACAAATAACACAC	CCATTCACCGAAGAGGAAAT	ATACTTTACAAACAAATAACACACCCATTCACCGAAGAGGAAAT
M112-AT-meridionale(39)	39	ACAAATATCTAACTACTATCACAA	CTCGTGTTGTAGTGAAAGAT	ACAAATATCTAACTACTATCACAACTCGTGTTGTAGTGAAAGAT
M113-RED-meridionale(42)	42	CACTACACATTTATCATAACAAAT	CAGTATTGATCATGAGGCTA	CACTACACATTTATCATAACAAATCAGTATTGATCATGAGGCTA
M114-RED-boothii(44)	44	TCATCACTTTCTTTACTTTACATT	ATTGGTGTTGCCTTCGCC	TCATCACTTTCTTTACTTTACATTATTGGTGTTGCCTTCGCC
M115-AT-boothii(45)	45	TACACAATATTCATCATAACTAAC	AAGGTCTTAAGCGCTTCG	TACACAATATTCATCATAACTAACAAGGTCTTAAGCGCTTCG
M120-MAT-asiaticum(54)	54	TTAATACAATTCTCTCTTTCTCTA	GGCTACTTTTCTGAGTACTCT	TTAATACAATTCTCTCTTTCTCTAGGCTACTTTTCTGAGTACTCT
M121-AT-asiaticum(55)	55	ACATCAAATTCTTTCAATATCTTC	AAGCTGGGCGTTCTTCAA	ACATCAAATTCTTTCAATATCTTCAAGCTGGGCGTTCTTCAA
M122-EF-graminearum(57)	57	ACTTACAATAACTACTAATACTCT	ACTCGAGCGACAGGCGTC	ACTTACAATAACTACTAATACTCTACTCGAGCGACAGGCGTC
M123-AT-graminearum(58)	58	CAATAAACATTCTTTACATTCTCA	ATAGTTCCTTACCTTGAAAACTAT	CAATAAACATTCTTTACATTCTCAATAGTTCCTTACCTTGAAAACTAT
