# Supplementary material for: A single-nucleotide-polymorphism-based genotyping assay for simultaneous detection of different carbendazim-resistant genotypes in the Fusarium graminearum species complex
Source: PeerJ. 2016 Oct 25;4:e2609. doi: 10.7717/peerj.2609 (PMC5088611; doi:10.7717/peerj.2609)
Supplement: Table S2 [file peerj-04-2609-s002.xlsx]

## Sheet: Sheet1
Table S2 MFI of 17 probes and the corresponding results on 156 Fusarium isolates form Jiangsu, Anhui and Sichuan Province
Provinces	Sampling sites	Isolates	Carbendazim resistance					B-FHB	Fg clade		F. gramineraum		F. asiaticum		F. meridionale		F. bothii		15ADON		NIV		3ADON
			167F	198F	198R1	198R2	200R	ATb	ATg	EFg	EF7	AT7	MAT6	AT6	AT2	RED2	AT3	RED3	T12-15	T3-15	T12-N	T3-N	T3-3	T12-3	Species	Chemotype	Resistant genotype	MBC sensitivity by MIC
Jiangsu	Gaoyou	1	1943	67	44.5	17	78	2409	2184	7738	37	79	8187.5	1935	42	112.5	45	153	22	45	16	76	6009	1957	F. asiaticum	3ADON	F167Y	R
		2	87.5	115	46	24	85.5	3154	2598	7023	43	117	8825	2163	52	135.5	30	41	26	52	12	107	7184	1939	F. asiaticum	3ADON	-	S
		3	63	124.5	47	22.5	85	3176	3132.5	7523.5	37	134	9424	2428.5	73	176	47	50	30.5	57	15	118	7301	2336	F. asiaticum	3ADON	-	S
		4	51.5	66	50	24	69	2903	2233	6040	38.5	92.5	8662.5	1788.5	49	112	77	44	30	54	104	131.5	6508	1885.5	F. asiaticum	3ADON	-	S
		5	2233	138.5	39.5	21	52	2770.5	2429.5	7266.5	35	105	8347	2099	37	139	41.5	119	24.5	53.5	19	96	6619	1955	F. asiaticum	3ADON	F167Y	R
		6	2429.5	101	48.5	19	70	2120	1844	8259	33	70	7786	1708	17	42.5	39	50	20	28.5	9	65	6251	1994	F. asiaticum	3ADON	F167Y	R
		7	54	108	49	25	137	3107.5	2870.5	7594	38	127	9490	2405.5	53	124.5	49	101	33.5	50	30.5	114	7633	2225	F. asiaticum	3ADON	-	S
		8	85	144.5	43.5	24	114.5	3068	2973	8437.5	47	121	9160	2406	49	154	45	138	27	57	26.5	96	7555	2384	F. asiaticum	3ADON	-	S
		9	97	139	48	31	112.5	2384.5	2085	7294.5	38	90.5	8170	1894.5	34	86.5	34	94	23	45	20.5	95	6201	2112	F. asiaticum	3ADON	-	S
		10	62	61	88.5	28.5	59	1428.5	1125	8095	3767	1707	161	37	46	168.5	29	70	4274.5	8319.5	18	156	32	94	F. gramineraum	15ADON	-	S
		11	89	112	59	34	100	1917	1550	8455.5	76	70.5	6355	1447	39	72	35	109	29	43.5	30	29	4024	4436	F. asiaticum	3ADON	-	S
		12	2260.5	80	53	36	63	2679	2260.5	7976	72.5	91	8451	2355	43.5	85.5	29	156	31	56	26	90	6214	2283.5	F. asiaticum	3ADON	F167Y	R
		13	65	98.5	38	25.5	79	2431	2067.5	7510	35.5	83.5	8324	1915	44	164	34	41.5	31.5	47	12	78	6180	1962	F. asiaticum	3ADON	-	S
		14	69	101.5	56.5	33	115	1207	972	8667	3903.5	1385	123	31.5	69	204	29	41.5	3722	7686	11	139	37.5	122.5	F. gramineraum	15ADON	-	S
		15	1929.5	56	105.5	44	46	2428	1803	7087	33	110.5	7194	1709	50	151	34.5	92	22.5	50	14	85.5	6200	1569.5	F. asiaticum	3ADON	F167Y	R
		16	2372	71.5	95	33	79	2320.5	1902	6762	40	96	6823.5	1826	50	144.5	29	41.5	32	55.5	22	70	5003	1576.5	F. asiaticum	3ADON	F167Y	R
		17	66	60	123.5	38.5	305	1471	1212	5520	23	44	5797.5	1893	30.5	55.5	35	104.5	18.5	32	14	37.5	5151.5	997.5	F. asiaticum	3ADON	-	S
		18	67	114.5	56.5	23	71	1805	1348.5	5478	43	59	6797	1108	38	70	31	70	10	41.5	18	37	5276	1417	F. asiaticum	3ADON	-	S
		19	65	124.5	49	35	72	1780.5	1441	4999	29	57	5415	1066	34	78	29	129	24	41	22	30	4982.5	1861.5	F. asiaticum	3ADON	-	S
		20	53	1832.5	51	33	75.5	2761	2388.5	6925.5	43	102.5	8650	1957	51.5	142.5	36.5	86	22	47.5	21	101	6249.5	2022	F. asiaticum	3ADON	E198Q	R
		21	63	60	46	21.5	76	2175.5	1775	6830	19	65	5243.5	1550	29	169	40	102	21	35	13	62	3991	1142	F. asiaticum	3ADON	-	S
		22	64	104	56	23.5	114	1774	999	3782	20	27	4681	1540	19	36	39	132	13	25	16	25	3664	983.5	F. asiaticum	3ADON	-	S
		23	79	153.5	65.5	26.5	113	2037	1646	6321.5	31	79	7154.5	1310	30	99	41	41.5	30	39	143.5	125	1297	1405	F. asiaticum	3ADON	-	S
		24	87.5	85	49	19	286	1544	1002	5306.5	34	33.5	5685.5	1830	20	46.5	38.5	114.5	24	32	26.5	30	3340	3388	F. asiaticum	3ADON	-	S
		25	51	76	43.5	28	278	2263	1853	6454	35.5	86	7170.5	1548	37	90	42	70	17	38	10	74	5454	1627.5	F. asiaticum	3ADON	-	S
		26	60	124.5	39	32	66	1730.5	1741	5099	29	55	5815	1366	34	68	35	129	25	42	22	30	4982.5	1861.5	F. asiaticum	3ADON	-	S
		27	55	98.5	47	31	56.5	1976	1705	6987.5	40	74	5883	1469	40	201	41.5	100	20	50	18	64.5	5113	1481	F. asiaticum	3ADON	-	S
	Yangzhou	1	88	119	49	23.5	102.5	2121.5	1689.5	5676	24	77	6917	1446.5	32	65	37	76.5	20	29	13.5	62	5865	1571	F. asiaticum	3ADON	-	S
		2	46	137	48	24	72.5	2344	1929.5	6273	44	84	7941	1590	32	80	41.5	110.5	34	38.5	15.5	84	5806	1785.5	F. asiaticum	3ADON	-	S
		3	50.5	134	48.5	26	102.5	2827.5	2372	6678	39	109	8162	1864.5	41.5	114.5	33	139	26.5	39.5	23	72.5	6866	1808	F. asiaticum	3ADON	-	S
		4	55	100	48	18	72	1529	1057.5	5002.5	20	56	5134	995	38	93	49.5	105.5	25	41.5	15	49	3856	1099	F. asiaticum	3ADON	-	S
		5	64	137	55.5	41.5	112	924	1329.5	3543	18	39	2231.5	1326	30	63	24.5	107	22	34	27	19	1811	3491	F. asiaticum	3ADON	-	S
		6	71	134	48	23	61	1667	1409.5	3851	21.5	31	2925	1412	22	59	33.5	63	17	28.5	11	28.5	2413	1561	F. asiaticum	3ADON	-	S
		7	89	133	45	31.5	63.5	2065.5	1743	6764	30.5	77	7130	1513.5	45	110.5	35	63	27	41	15	71	5722	1589.5	F. asiaticum	3ADON	-	S
		8	2396.5	61.5	48	24.5	46	2751.5	2247	6657.5	34.5	81	8282	1663	39	85	39	64.5	31	34	19.5	71	6626	1797.5	F. asiaticum	3ADON	F167Y	R
		9	91	65	61.5	23.5	77	1740	1441	5682	20	54	5839	1099	24	53.5	30	65	21	27.5	10.5	32	6063.5	1094	F. asiaticum	3ADON	-	S
		10	53	120.5	58	25	65	1907	1827.5	3718	14.5	39.5	4051	1050	23.5	30	44	79	17	21.5	15	23.5	4525	2599	F. asiaticum	3ADON	-	S
		11	61.5	97	46	23	63	3633	3169	6749.5	41.5	107.5	9143	2442	31	81	35	70	22	36.5	36	33	5330	5343.5	F. asiaticum	3ADON	-	S
		12	2190	114	59	30.5	42	3518.5	3043	6324.5	22	83.5	8119	2346	26.5	29	34.5	66	18	28	19.5	52	7607	1728	F. asiaticum	3ADON	F167Y	R
		13	88.5	86.5	50.5	19	99	2076.5	1736	7270	18	54	6715	1529	20	43	35	71	21	32	19	43	6096.5	1491.5	F. asiaticum	3ADON	-	S
		14	2589	121	69	29	71	2461	2159	5447	22	63	6647	1505	22	46	27	65	9	22	13	36	6018	1009.5	F. asiaticum	3ADON	F167Y	R
		15	35	134	63	29	101	1555.5	1510	4274	23	45	5229	979.5	22.5	23	83.5	57	18	23	10	17	4938	1724	F. asiaticum	3ADON	-	S
		16	53	89	51	19	61	1198	990	5073	14	31.5	4808	1700	24	39.5	31	85.5	20	28	14	22.5	4127.5	1621	F. asiaticum	3ADON	-	S
		17	57	135.5	53	24	61	1758	1753	4217	18	45	5248	1149	21	33	28	70.5	16	21	12	23	5342	1721	F. asiaticum	3ADON	-	S
		18	63	142.5	43	35	92	2413	2096	6016	17.5	75	8069.5	1543.5	33.5	62	35.5	72	17.5	20	22	52	6595	1401	F. asiaticum	3ADON	-	S
		19	61	56	51	23.5	3378	2581.5	1999.5	6529	19.5	53	7280	1615	25	28	33	59	17	31.5	10.5	41.5	6604	1431.5	F. asiaticum	3ADON	F200Y	R
		20	89	66.5	58	26	52	2366.5	1943	7015	23	72	7342	1753	31	71	47	56.5	23	23.5	21.5	48.5	6137	1457.5	F. asiaticum	3ADON	-	S
		21	51	113	55	31	69	2858	2810.5	8362.5	35	103	8581	2477	31.5	43.5	20.5	65	29	32	15	72	7059.5	2090.5	F. asiaticum	3ADON	-	S
		22	84.5	77	56	27.5	299	1324	1356	4576	9	41.5	5131	972.5	12.5	28	30	64	12.5	27	7	30.5	5302	2680	F. asiaticum	3ADON	-	S
		23	89	87	59	37	114	2224	1768	5683	27	67	6978	1383	25	27	30	63	24	26	143	125	3827	3535	F. asiaticum	3ADON	-	S
		24	48	63	60	28	43.5	1552	1351	5508	17	35	5585	998	18	30	30	59	12.5	24	11	39	5767	912	F. asiaticum	3ADON	-	S
		25	66	146	44	54	60	1812	1644	6325	28	63	8284	1469	27	63	41	71	0	27.5	53	18	3991	4010.5	F. asiaticum	3ADON	-	S
		26	90	131	49	23	56	1523	1395	4242.5	29	38.5	4604	1264	24	60	44	92	27	26	14	45	4933	1174.5	F. asiaticum	3ADON	-	S
		27	2544	64.5	46.5	36	73	1373	1319	2198	23	30	4068	2151	15.5	30	43	100.5	17	23	18	34	4192	937	F. asiaticum	3ADON	F167Y	R
		28	52	133	65	24	277	1503	1399	4216	32	29.5	4926	1249	23	56	30	75	22	34	19	61	5378	1449	F. asiaticum	3ADON	-	S
		29	54.5	60	126	59	108	1708	1647.5	3930	41	118	4961	1312.5	168	200	43	59	64	153	82	115	5333	1394	F. asiaticum	3ADON	-	S
		30	48	71	92	34	68	2261	1119.5	8375	42	95	7944	1220	72	113	41	53	40	56.5	6343.5	5379	44	123	F. asiaticum	NIV	-	S
		31	45	57	108	37	279	1811	2718	9192	49	73.5	9487	1547.5	68	167	42	53.5	33.5	59	6846.5	5926	36	132	F. asiaticum	NIV	-	S
		32	51	92	48	28	300	1164.5	820.5	5394.5	2429	1314.5	93	33	39	98	45	85	2965	5119.5	23	76	30	47	F. gramineraum	15ADON	-	S
Anhui	Fengtai	1	66.5	80	61.5	23	98	1466	2396.5	4185	25	101.5	4479.5	2222	86	185	34.5	92	44.5	69	31	105	4753	1291.5	F. asiaticum	3ADON	-	S
		2	71.5	142	116	102	52	2571.5	1476	7108	36	94	5604	316	87	131	34	77	48.5	77.5	58	125	4999.5	4446	F. asiaticum	3ADON	-	S
		3	85.5	124	105	108	71.5	1378.5	1313	4414.5	19.5	45	5591	1186	35	93	38	74.5	27.5	35	18	70	6073.5	1389	F. asiaticum	3ADON	-	S
		4	45	149.5	78.5	36.5	90	1460.5	1371	4763.5	31	69.5	5280	1236	62	134	28	66	43	63	28	91	5541	1470	F. asiaticum	3ADON	-	S
		5	57	128	100	56	61	1111	953	5416.5	34	73.5	7383	948	54	110	29.5	85	35.5	56	28	106	7063	1883.5	F. asiaticum	3ADON	-	S
		6	77	138	69	23.5	35	3070	2670.5	501	3344.5	3202.5	235	59	56	110.5	33	56	5271	7254	16	136	28	68	F. gramineraum	15ADON	-	S
		7	83.5	69.5	121.5	77	53.5	1578	1460	5277	40	100	5844	2275	105	108	29.5	66.5	54	91	49	127	5683	1593.5	F. asiaticum	3ADON	-	S
		8	85	63	109.5	48	93	1529	1411.5	4670	36.5	108.5	4614.5	2295.5	79	105	88.5	72	47	71	35	112.5	5174	1451	F. asiaticum	3ADON	-	S
		9	37	58	143	35.5	57	821	1632	5752	34.5	96.5	6278	1383.5	71	198.5	37	80	39	50	36	110.5	6578	1828	F. asiaticum	3ADON	-	S
		10	74	153	199	53	43	930	2751	6513	40.5	112	7243	1428.5	71	182	38	68	47	70	35	125	6622	1911	F. asiaticum	3ADON	-	S
		11	75	139	79	32	42	1480	1385	5100	27	40.5	5932	1231	29	61	30.5	77	20	26	22	35.5	4677	4342	F. asiaticum	3ADON	-	S
		12	81	63	127.5	31	137.5	3394	2332	4352.5	23	52.5	4953	2193	36	87	33	56	24	42	26	79.5	5761.5	1411.5	F. asiaticum	3ADON	-	S
		13	81.5	120	101	104	43.5	702.5	488.5	6275.5	3373	1212.5	67.5	27	28	21.5	40	64	2596	5687	25	84	21.5	21	F. gramineraum	15ADON	-	S
		14	41	145.5	74.5	32.5	52.5	656	529.5	6031	3393	1789	67	30	22	19.5	39	57	2439	6493.5	21	91	13	24	F. gramineraum	15ADON	-	S
		15	56	73	205	20	62	1359	1295	4418.5	30	82	3522	2190	79	187	36	56	53.5	85.5	31	100	4425	1180.5	F. asiaticum	3ADON	-	S
		16	48	99	66	34	60	1245	2190	6163	83.5	87	3438.5	3113.5	82	133	43	60	62	101	107	104	3416	3714	F. asiaticum	3ADON	-	S
		17	2345	59	113.5	40	246	1348	1280	5610.5	38	78	4506	1142	64	113	33	56	51	75	38	105	5209	1342	F. asiaticum	3ADON	F167Y	R
		18	53	124	96	52	55.5	2404.5	1876	6346	2910.5	2612.5	167.5	42	50	82	38.5	59.5	4352	5899.5	27	102	18	49.5	F. gramineraum	15ADON	-	S
		19	76.5	110.5	77	33	285	2517.5	1392.5	6288	49.5	96	6069	1295.5	84	167	24	79	38	79	39	115	6222	1689	F. asiaticum	3ADON	-	S
		20	80	59	133	37	95	1256	2214	5170	77	77	3711	1117	64	163	32	59.5	26	65	55	99	3673	3852	F. asiaticum	3ADON	-	S
		21	69	72	57	21	298	1262	1230	5252	34	104	3838	1309	74	153	27	96	35.5	85	28	100.5	4730	1192	F. asiaticum	3ADON	-	S
		22	79.5	65.5	117.5	73	46.5	3528.5	3392	7392	3436	3626.5	231	53	53	112	32	68	5839	7354	22	138.5	28	62	F. gramineraum	15ADON	-	S
		23	77.5	82	57	20	36	2140.5	1181	6206	121	205	3245	2222	72	149.5	48	60	76	120.5	54.5	188	5690	2299	F. asiaticum	3ADON	-	S
		24	89.5	112	81	27	114.5	321	1284.5	6312	35	89	4287	1160	89	197	54	64	38	83	47	108.5	3992	4060	F. asiaticum	3ADON	-	S
		25	89.5	96	45.5	23	87.5	1211	1220	8346	45	89	3098	2123	83.5	166	59.5	61.5	41	70	34.5	142	2778	4098	F. asiaticum	3ADON	-	S
		26	58	58	50.5	22	39	1184	921	9324	44	109	8624.5	2730	96	135	22	91	28.5	78.5	6303.5	5739	41	151.5	F. asiaticum	NIV	-	S
		27	2247	56.5	124	45	93	1240	239.5	8484	68	64	3573	1140.5	60	142	34	78.5	38	66	101	115	3516	4347.5	F. asiaticum	3ADON	F167Y	R
		28	91	113	51	21.5	42	1679.5	1672	8134	48.5	204	6308	1357.5	152.5	185	27.5	65	64	129	60	173.5	6664	2045	F. asiaticum	3ADON	-	S
		29	67	58	122	46	67.5	1557	1424.5	7016	43	82	6450	1283	89	153.5	38.5	63.5	37	72	42	113	6609.5	1935	F. asiaticum	3ADON	-	S
		30	81	142	73	27.5	36	1833.5	1729	3528	30	68	5960.5	2386	57.5	102.5	30	57	32	46	32.5	75.5	5894.5	1488	F. asiaticum	3ADON	-	S
		31	77	85.5	46.5	18.5	54	1452	2344.5	8524	30	60	5963	2275	41	158	34	65	26	35	26.5	72	4557.5	5289	F. asiaticum	3ADON	-	S
	Xuanzhou	1	79.5	56.5	64.5	26	110.5	1962	2589	8662	52	102	6634	1390.5	103	172	40.5	80	32	68	52	198	5365	5455	F. asiaticum	3ADON	-	S
		2	81	66	53	30	77	2149	1124	7330	35	49	5236	2126	64	124.5	28	77.5	32	59	30	126.5	3751	3972.5	F. asiaticum	3ADON	-	S
		3	66	90	62	19	89	1685	2544	5070	29	55	5895.5	1347	31	87	35.5	82.5	27	37	20.5	40	5034	4329	F. asiaticum	3ADON	-	S
		4	85.5	99	46	25	246	2775	2596.5	5470	30	36	6443	1416	37	75	43	95	28	33	19	39.5	5352	4553.5	F. asiaticum	3ADON	-	S
		5	90	76	114	47	110.5	2763	1583	9459.5	39	52	9084.5	1546	46	180	56	53	28	25	32	76	5702.5	5507.5	F. asiaticum	3ADON	-	S
		6	54	75	152.5	42	43	2404	2255	8504.5	39	31	6001.5	1220	44	101	56	52	18	24	20	56	4195	4186.5	F. asiaticum	3ADON	-	S
		7	2725.5	113	49.5	17	148	2781	517	9648	38.5	34	8400	1514	40.5	39	35	55.5	28.5	31	29	27	5771	5954	F. asiaticum	3ADON	F167Y	R
		8	38	112.5	150	31	60	1523	2455	7772	33	54	7378	1353.5	64.5	135	48.5	54	27	50	33	91	5352	5195	F. asiaticum	3ADON	-	S
		9	48.5	69.5	84	23.5	62	1740	1569	8543	48	74	6503.5	2405	62	113.5	76	58.5	35	60	46	113	5620	5496.5	F. asiaticum	3ADON	-	S
		10	48.5	92	110	49	45	1795	1634	9327	19	32.5	9379	1634	29	60	33	69	25	22	16	23.5	5350	5528	F. asiaticum	3ADON	-	S
		11	51	71	50	23.5	41	2893.5	2733.5	10194	41.5	29	8728	1648.5	26	91	37	54	26	36.5	21	39.5	5430	5175	F. asiaticum	3ADON	-	S
		12	69	66	76	26	224.5	1858	2725	8226.5	41	77	7310	1498	82	129	29	55.5	36.5	71.5	48	109	5586	5136.5	F. asiaticum	3ADON	-	S
		13	1945	81	44	18	46.5	1526	1438	7881.5	29.5	90	6311	1289	65	146	23.5	53	38.5	63	31	131	6545	1724.5	F. asiaticum	3ADON	F167Y	R
		14	47.5	61	63	17	57.5	2554	1411	5986	33.5	58	5878	1280	51	150	40	94.5	40.5	41.5	25	75	5023	4572	F. asiaticum	3ADON	-	S
		15	78	84	80	21	36	1660	2529.5	6885	20	29	8221	2478.5	24	33	28	49	22.5	21	17	18	4076	4489	F. asiaticum	3ADON	-	S
		16	55.5	78	59.5	27	111.5	2818	1666	9653.5	35	28	8703	1597	29.5	66	34	152	25	28	23	36	5941	5731	F. asiaticum	3ADON	-	S
		17	80	2125.5	82	24	92	1472	1341	8921	26	27	7817	2347	12.5	26.5	29	18	13	18	14	10	4310.5	4620.5	F. asiaticum	3ADON	E198Q	R
		18	69	110.5	47	25	86.5	1131	1156.5	1755	13.5	25	3192	1121	31	22	38	46	15.5	21	5	18	1009.5	1070.5	F. asiaticum	3ADON	-	S
		19	75	82.5	52	19	28	1500.5	1357	9050	142	21	7286	2332	17	56	45.5	47	24	44	11.5	41	4711	5095	F. asiaticum	3ADON	-	S
		20	74	71	49	16	57	2489	1528.5	3350.5	12	19	7158	1276.5	19	24	32.5	45	18	9	16	21.5	2563	2423	F. asiaticum	3ADON	-	S
		21	2301.5	65	52	22.5	39.5	1355	1488	4607	10.5	22	5622	1280.5	16.5	21.5	72.5	71.5	7	13	10	11	3086	2711.5	F. asiaticum	3ADON	F167Y	R
		22	72	85	55	19	37	1345	2247	7308.5	22	9	7530.5	1251	22	17	33	18	19	17.5	13	23	3861	4311	F. asiaticum	3ADON	-	S
		23	74	102.5	47.5	17	109	1564.5	1423	9751.5	56	16	7882	1421	9	35	34	50	21	11	22	31.5	4759	5041	F. asiaticum	3ADON	-	S
		24	76	63	42	21	56	2440.5	1366	5974	23.5	18.5	9386	1332	22	46.5	34	52	22.5	11	13	14.5	3760	3725.5	F. asiaticum	3ADON	-	S
		25	90.5	54	44	20.5	110	2997	1006	9118.5	22	36	10295.5	1840	15	18	31	188	20	24	15	30.5	5046.5	4941	F. asiaticum	3ADON	-	S
		26	95.5	57.5	43	24.5	101	2468	2345	7841	22	37	8538	1391	17	37	53	55	15	13	22	26	3998	4087.5	F. asiaticum	3ADON	-	S
		27	82	101	49	24	75	2127	1171	2357	16	23	3370	2103	16.5	12	40	59	22	18	10	23	1215.5	1030	F. asiaticum	3ADON	-	S
		28	70	71	57.5	23	96	2174	1227.5	1873	12	15	2694	2163	24	23	57	42	21.5	24	11	4.5	1896	2670	F. asiaticum	3ADON	-	S
		29	76.5	70	42	16.5	63	2392	1549	7406	45.5	67	6545.5	1442	47	114	48	49	28	33	23	32	5150.5	4282	F. asiaticum	3ADON	-	S
		30	90	51	38.5	39	57.5	2823.5	2274	9594	54	109	9821.5	2079	69	173	46	83	38	59	26	130	8424	2746	F. asiaticum	3ADON	-	S
		31	70	110	70.5	43.5	37	1365.5	2336	11884	63	85	6517	1241	73	186	51	52	56	71	52	148.5	5583	5624	F. asiaticum	3ADON	-	S
		32	95	63	113.5	38	139.5	1093.5	1844	8241	77	96.5	6140	1712	79.5	147	70	170	45	93	29	132.5	4661	4546.5	F. asiaticum	3ADON	-	S
		33	73	54	101.5	26.5	52.5	1305	1995	8621	153	69	5922	1877	35.5	118	39	43	37	70.5	27	58.5	4435	4351	F. asiaticum	3ADON	-	S
		34	93	62	135	28.5	42.5	1532	1548	10512.5	65	143	6267.5	1345	110	155	52	72	53	96	43	204	8653	2343	F. asiaticum	3ADON	-	S
		35	72	59	191	31.5	91	1271.5	2252.5	11046	206.5	71	3727	1183	65.5	146	36	41.5	72	161	38	132.5	7261	1383.5	F. asiaticum	3ADON	-	S
Sichuan	Mianyang	1	38	72	37	41	29.5	1917	1550	8455.5	76	70.5	6355	1447	39	72	51	44	29	43.5	4024	4436	30	29	F. asiaticum	NIV	-	S
		2	75.5	47.5	93	22	144.5	1610.5	1476	9200	3664.5	760	172	25.5	36	148	43	62	6303	8399.5	36.5	131	23	81	F. gramineraum	15ADON	-	S
		3	76	87	62	24	92	1327.5	1112	8587	45	92.5	9164	2841	74.5	154.5	33	54	40	65	6464	5920	41	115	F. asiaticum	NIV	-	S
		4	90	93	62	16	99	956.5	751	7751	41.5	65	7800	1565.5	40	114.5	19	93	25	42.5	5952	5216	22.5	49	F. asiaticum	NIV	-	S
		5	82	77	41	25	112	1792	1649	9255.5	41	32	10053	1573.5	26	87.5	33	44	29	25	5996	5739	18	54	F. asiaticum	NIV	-	S
		6	82.5	55.5	45.5	24	48.5	3377.5	2767	7000	39	130	9149	2315	61.5	163	63	55	28	54.5	6346	5474	30	70	F. asiaticum	NIV	-	S
		7	70.5	69	42.5	47	147	1530	1433	7763	2989	586	137	22	32	73	54	89.5	5216.5	7226	26	75	26	33.5	F. gramineraum	15ADON	-	S
		8	76	102.5	52	30	94	2691	2125.5	7286.5	47	131	8817	1813.5	72	194	66	65	33	56	6098	5406	24.5	110	F. asiaticum	NIV	-	S
		9	69	53.5	36	29	29.5	3080.5	2301.5	9433	52	196	8545.5	1989	120	132	68	69	43.5	100.5	6400	5663	54.5	174.5	F. asiaticum	NIV	-	S
		10	94	69	41	36	139	3006	2547	10093	57	113	9212	2161	90	116	48.5	49	29	59	6149	5809.5	28	96.5	F. asiaticum	NIV	-	S
		11	95	89	57	41	148	3996	3309	9868.5	62.5	116.5	10713	2919	63	150.5	62.5	181	26	43	7267	6239.5	24.5	82	F. asiaticum	NIV	-	S
		12	68	77	118	30.5	109.5	3725	3054.5	9243.5	56	98	9654.5	2775.5	32	81	50.5	76	20.5	31	6322	5619.5	16	31	F. asiaticum	NIV	-	S
		13	92	61	53.5	36	142.5	2982	2365	9579	50.5	136.5	8487	2092	71	164	65	116	31.5	49	6123.5	5666.5	40	140	F. asiaticum	NIV	-	S
		14	61	45.5	61	54	54	1315	1311	9739.5	3727	51.5	246	28	28.5	68	39	121	7305.5	9413.5	26	153	16	37	F. gramineraum	15ADON	-	S
		15	70	85	97	38	87	2223	1665.5	9582	38	80	8880	1578.5	52	83	52	52	30	49	6068	5103	14	46	F. asiaticum	NIV	-	S
		16	72	52.5	57.5	31	221	2159	1709	9731	66	157	8095.5	1395.5	128	121	36.5	41	38	72	38	153	7382	2319	F. asiaticum	3ADON	-	S
		17	68.5	53.5	65	40	149	3511	2752	9751.5	51	182	9065	2482.5	85.5	148	37	49	47	76.5	6654	5745	58.5	155	F. asiaticum	NIV	-	S
		18	85	85	37.5	28.5	216	1871	1764	8837	3699	1026	192.5	19.5	27	98	68	51	6879	9241	28	156	20	79	F. gramineraum	15ADON	-	S
		19	67.5	52	43	29	29	3290	2579	9583	48	137	9195	2203	84	152.5	52	42.5	44	69	6527	5465	47	132	F. asiaticum	NIV	-	S
		20	89.5	86	66.5	36	148	1220	1203	6385	2022	19	104	13.5	26	12.5	34	87	3568	4979	7	42	9.5	13	F. gramineraum	15ADON	-	S
		21	75	92	114	28	150	1317	1209	5780	37	30	108	57	1622	1449.5	34	144	23	21	3077	2770	30	125	F. meridionale	NIV	-	S
		22	91	93	58	23	139	1825.5	1711.5	5664	40.5	50	7856	1672	21	34	77	47	14.5	19.5	15	70.5	7039.5	2276	F. asiaticum	3ADON	-	S
		23	93	54.5	105.5	46.5	71	1559	1464	5934.5	34	49	8482	1270.5	19	46	40.5	43.5	20	27.5	12	76	7573.5	2392	F. asiaticum	3ADON	-	S
		24	92	60	92	28	142	3102	2778	9737.5	52	163.5	9056	2285.5	93	168	41	45	46.5	71	5944	5530	40	156	F. asiaticum	NIV	-	S
		25	69.5	53	71	24	54.5	1581	1240	11456	70	126	96	62	984	1876	22	40	43	72	9642.5	2442	12	25.5	F. meridionale	NIV	-	S
		26	49	94.5	88	28.5	87	1845	1705	9185	3317	1033.5	198.5	16	15.5	52.5	65	70	5685	8159	28.5	115	5	36	F. gramineraum	15ADON	-	S
		27	92	109.5	108	49	35	4336	3398	9229	59.5	153	9547.5	2613	147	199.5	29.5	115	65	107	7247	5943	93.5	237.5	F. asiaticum	NIV	-	S
		28	72.5	56	116	28.5	35	3636	3126	10076	48.5	204	10261	2772	109.5	177.5	38	50	50	77	6701	6120	51.5	230	F. asiaticum	NIV	-	S
		29	84	94	56.5	16	59	2932.5	2176	7905	88.5	78.5	8984	1927	32	52.5	27	50	23	47	6324	5333	26.5	25	F. asiaticum	NIV	-	S
		30	91	69	116	42	90	981	2785	10089	46	81	8665	1679.5	66.5	199	26	54.5	26	61.5	6245	5720	30	149	F. asiaticum	NIV	-	S
		31	76	53.5	54	36	29	2322	2002	7445	59	81	8044	1626	24	61	66	39	23	41.5	4965	4129	25	32	F. asiaticum	NIV	-	S
	Control	js166	91	63	58	103	139.5	2074	1364	9775.5	47.5	57	7433.5	1758	88.5	145.5	37	51	35.5	38	27.5	57	5671.5	1265	F. asiaticum	3ADON	-	S
		js205	2295	104.5	67	51.5	172.5	2292	1307	5998	41	56	8100	1930	54	105.5	23	90	42	47	32	37.5	4334.5	5066	F. asiaticum	3ADON	F167Y	R
		js161	73.5	119.5	51	71	2401	2723.5	947	9142.5	59	170.5	6688	1334.5	40	78.5	37	41	52	73	26	27	5142	5232	F. asiaticum	3ADON	F200Y	R
		js801	95.5	2153	119	38.5	84	1265.5	2286	7865	77	133	8941	1342.5	75.5	154	67	52	70	85	29	39	3528	3749.5	F. asiaticum	3ADON	E198Q	R
		js166+pMD-198L	81	2010	1884	92	117	993.5	1112	2381	66.5	160	6744	1441	46	64	58	86.5	59	107	38	47.5	4811	4106	F. asiaticum	3ADON	E198L	R
		js166+pMD-198K	97	66	54.5	2892	251	1205	1168.5	1897	55.5	211	7370	1039.5	86	185	70	62	51	84.5	29	30.5	5129	4330.5	F. asiaticum	3ADON	E198K	R
		NRRL5883	98	104	155	63	179	1432	1490	7430	3024	1045.5	149	34	134	123	72	66	4532	5446	31	46.5	70.5	167	F. gramineraum	15ADON	-	S
		NRRL28436	75.5	79	89	50.5	246	1171.5	2215	9618	95.5	85.5	116	25.5	1010	1564	52.5	46	45	98	6324	5333	32	91	F. meridionale	NIV	-	S
		NRRL26916	55	63.5	115	68	117	3536	2277	11908	59	203	120	69	104	107	2103	1287	3766	6076	44	56	59	144	F. bothii	3ADON	-	S
